# Supplementary material for: 3D similarities between the binding sites of monoaminergic target proteins
Source: PubMed Central journal article supplement (PMC6054423; doi:10.1371/journal.pone.0200637), 2018-07-20
Supplement: pone.0200637.s001.pdf [file pone.0200637.s001.pdf]

## Supplementary Information

**Figure A: RMSD of MAO-A**

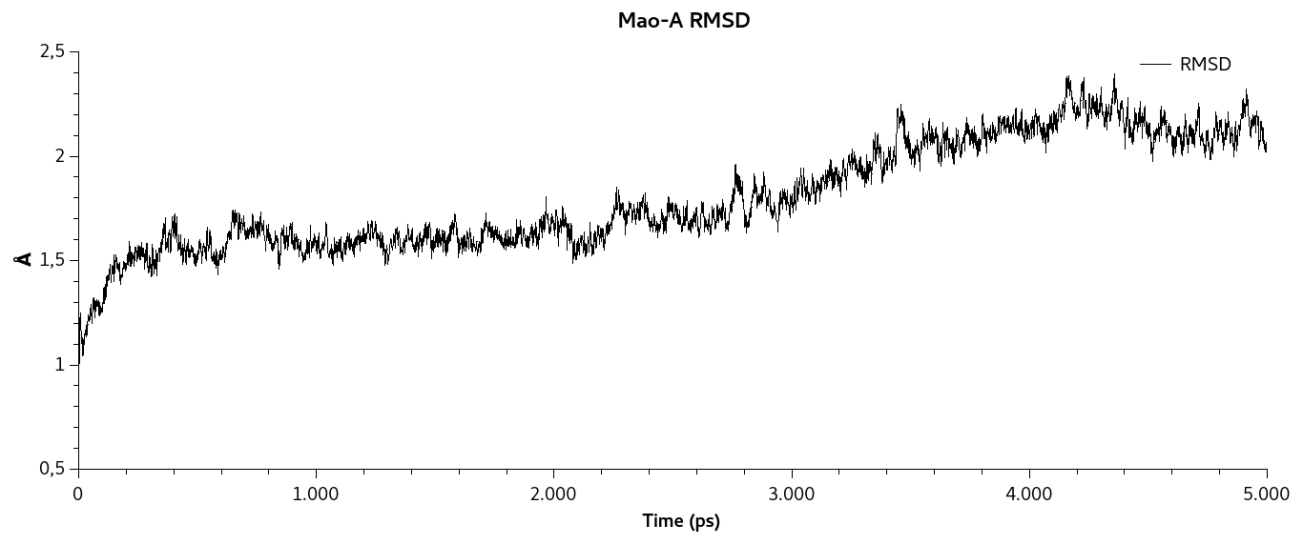

Figure A shows the RMSD of MAO-A in a simulation of 5 ns

**Figure B: RMSD of MAO-B**

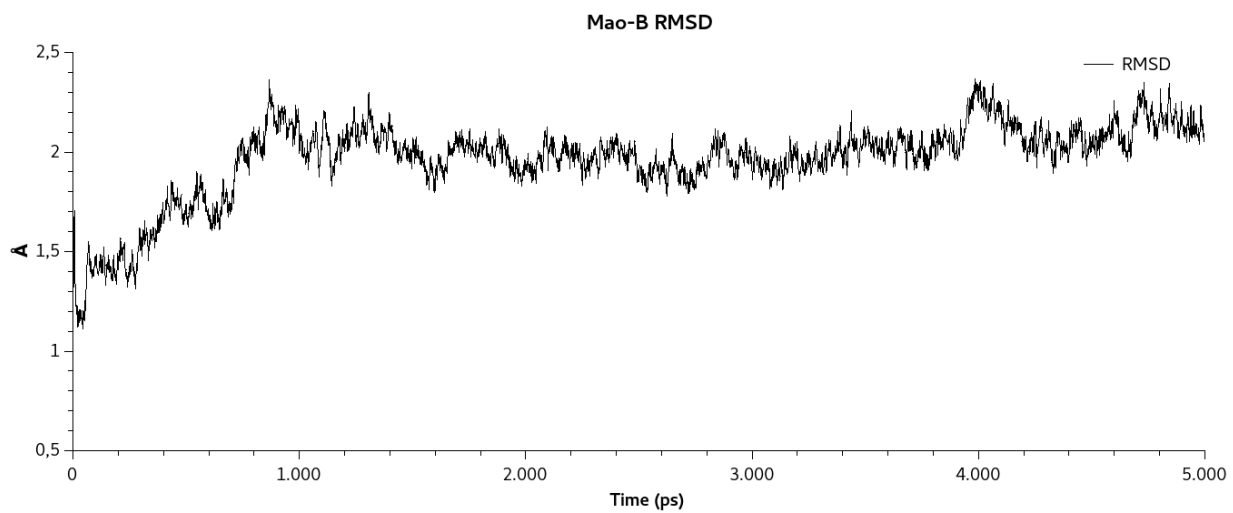

Figure B shows the RMSD of MAO-B in a simulation of 5 ns

**Figure C: RMSD of SERT**

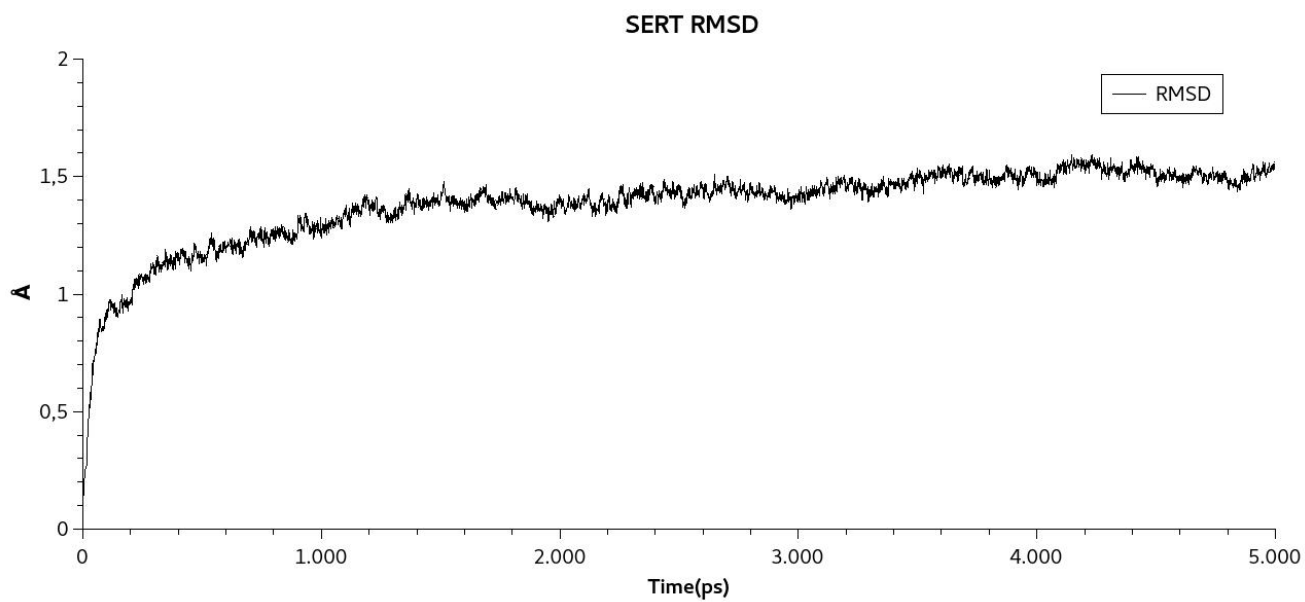

Figure C shows the RMSD of SERT in a simulation of 5 ns

**Figure D: RMSD of DAT**

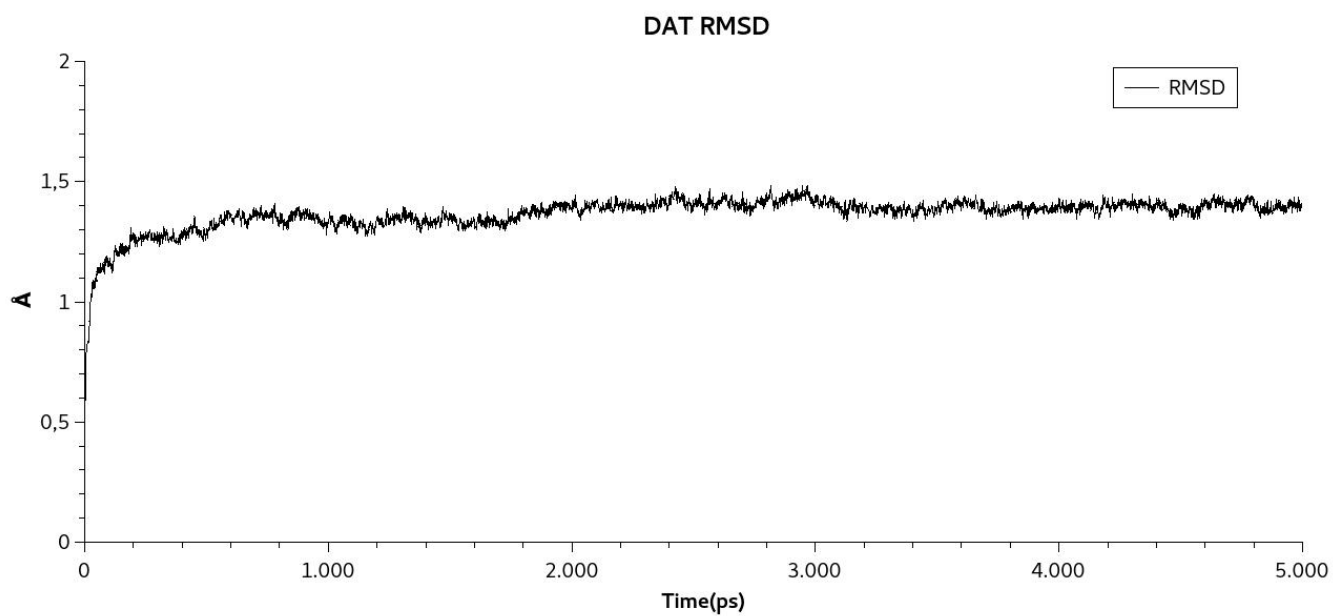

Figure D shows the RMSD of DAT in a simulation of 5 ns

**Figure E: ProsaII evaluation of DAT**

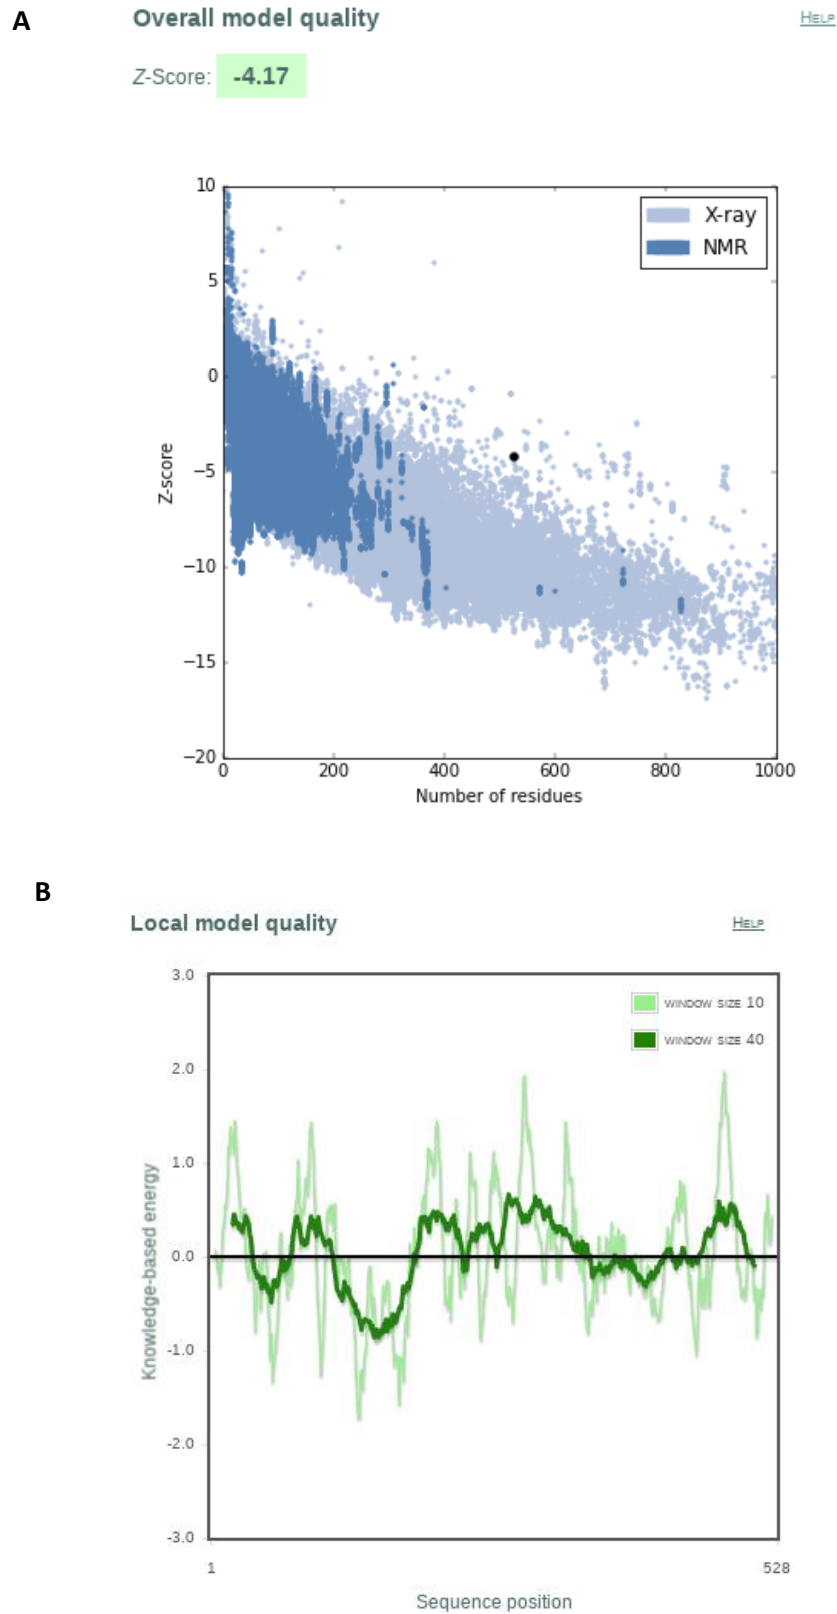

Figure E shows the evaluation of the homology model of the human DAT

**Figure F: Procheck evaluation of DAT**

**1. Ramachandran Plot statistics**

---

|                                      |                  | No. of<br>residues | %-tage |
|--------------------------------------|------------------|--------------------|--------|
|                                      |                  | -----              | -----  |
| Most favoured regions                | [A, B, L]        | 422                | 92.5%  |
| Additional allowed regions           | [a, b, l, p]     | 33                 | 7.2%   |
| Generously allowed regions           | [~a, ~b, ~l, ~p] | 1                  | 0.2%   |
| Disallowed regions                   | [XX]             | 0                  | 0.0%   |
|                                      |                  | -----              | -----  |
| Non-glycine and non-proline residues |                  | 456                | 100.0% |
| End-residues (excl. Gly and Pro)     |                  | 2                  |        |
| Glycine residues                     |                  | 47                 |        |
| Proline residues                     |                  | 23                 |        |
|                                      |                  | -----              |        |
| Total number of residues             |                  | 528                |        |

**2. G-Factors**

---

| Parameter                    | Score   | Average<br>Score |
|------------------------------|---------|------------------|
| -----                        | -----   | -----            |
| Dihedral angles:-            |         |                  |
| Phi-psi distribution         | 0.08    |                  |
| Chi1-chi2 distribution       | -0.43   |                  |
| Chi1 only                    | -0.15   |                  |
| Chi3 & chi4                  | 0.56    |                  |
| Omega                        | -1.07** |                  |
|                              |         | -0.39            |
|                              |         | =====            |
| Main-chain covalent forces:- |         |                  |
| Main-chain bond lengths      | -1.27** |                  |
| Main-chain bond angles       | -1.37** |                  |
|                              |         | -1.32**          |
|                              |         | =====            |
| OVERALL AVERAGE              |         | -0.24            |
|                              |         | =====            |

Figure F shows the evaluation of the homology model of the human DAT

**Figure G: RMSD between SERT and DAT**

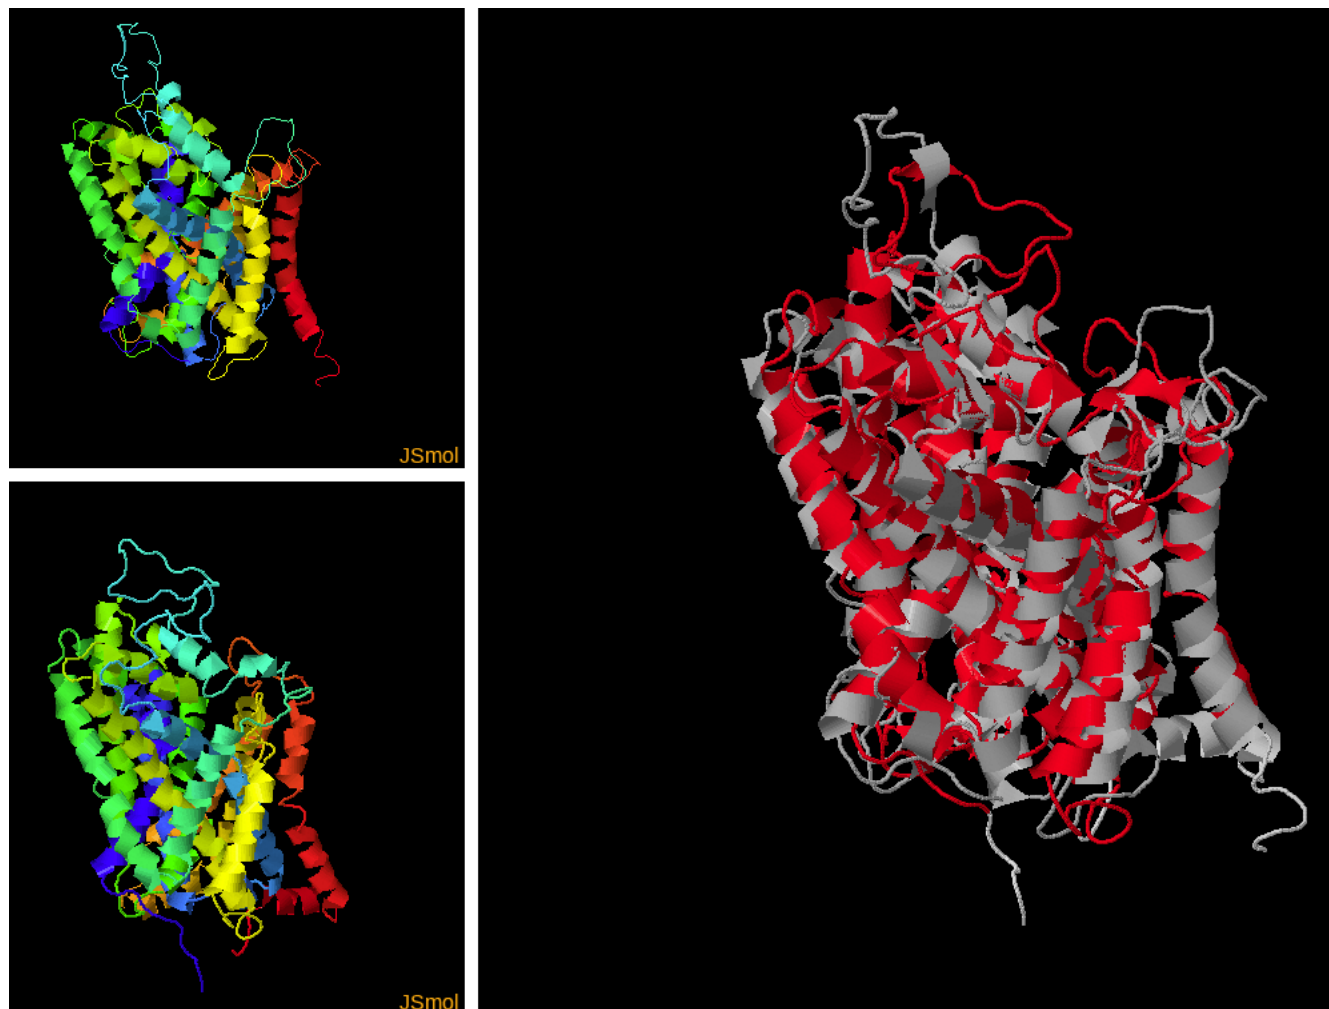

Figure G shows the structure alignment of SERT and DAT, which contains 466 equivalent positions with an RMSD of 3.0 Å (left top: DAT, left bottom: SERT). The structure alignment and the RMSD value were obtained using FatCat server (<http://fatcat.burnham.org>)

**Figure H: Average of Similarity between all dummy atoms in DAT and MAO-B**

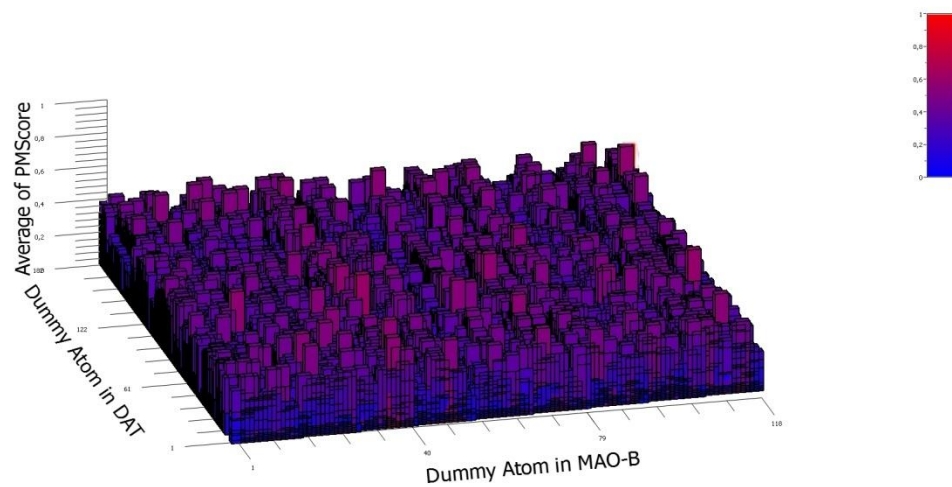

Figure H shows the average of similarity between all patterns around each dummy atom in DAT versus all patterns around each dummy atom in MAO-B (red). The dummy atoms inserted in DAT are represented on the Y axis, sorted by the Z coordinate. The dummy atoms inserted in MAO-B are represented on the X axis, sorted by the Z coordinate. The average of the PMScore is represented on the Z axis. Each colored block represents the mean of the PMScores obtained after comparing all patterns (3-10 Å). Red represents high similarity scores (PMScore > 0.5). Blue represents low similarity scores (PMScore < 0.5).

**Figure I: Average of Similarity between all dummy atoms in SERT and MAO-A.**

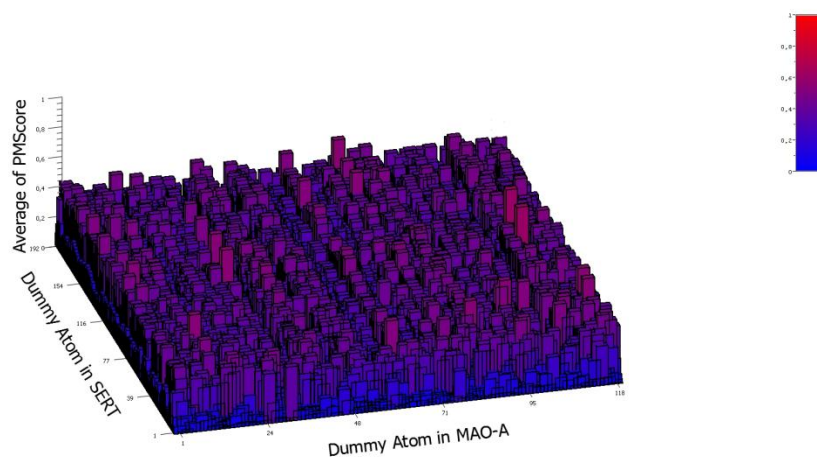

Figure I shows the average of similarity between all patterns around each dummy atom in SERT versus all patterns around each dummy atom in MAO-A (red). The dummy atoms inserted in SERT are represented on the Y axis, sorted by the Z coordinate. The dummy atoms inserted in MAO-A are represented on the X axis, sorted by the Z coordinate. The average of the PMScore is represented on the Z axis. Each colored block represents the mean of the PMScores obtained after comparing all patterns (3-10 Å). Red represents high similarity scores (PMScore > 0.5). Blue represents low similarity scores (PMScore < 0.5).

**Table A: Binding sites similarities between MAOA/SERT, MAOA/DAT, MAOB/SERT and MAOB/DAT**

| <b>Protein A</b> | <b>Protein B</b> | <b>PMScore</b> |
|------------------|------------------|----------------|
| Mao-A            | SERT             | 78,05 %        |
| Mao-B            | SERT             | 68,94 %        |
| Mao-A            | DAT              | 92,61 %        |
| Mao-B            | DAT              | 95,92 %        |

Table A shows the PMScore using MTA as ligand between the active site of MAOs and the S2 binding site of the transporters.

**Figure J: Representation of a sequence-based alignment between SERT and MAO-A.**

**A**

| Score         | Expect                                                          | Method                       | Identities | Positives  | Gaps     |
|---------------|-----------------------------------------------------------------|------------------------------|------------|------------|----------|
| 16.9 bits(32) | 2.4                                                             | Compositional matrix adjust. | 9/32(28%)  | 15/32(46%) | 3/32(9%) |
| Query 447     | ITAVLDEFPHWAKRRE---RFVLAVVITCF 475                              |                              |            |            |          |
| Sbjct 277     | +TA + P + A+R + R + VI C<br>LTAKIHFRPELPAERNQLIQRLPMGAVIKMM 308 |                              |            |            |          |

  

| Score         | Expect                               | Method                       | Identities | Positives | Gaps     |
|---------------|--------------------------------------|------------------------------|------------|-----------|----------|
| 15.4 bits(28) | 7.8                                  | Compositional matrix adjust. | 8/18(44%)  | 8/18(44%) | 0/18(0%) |
| Query 485     | GAYVVKLLEEYATGPAVL 502               |                              |            |           |          |
| Sbjct 25      | G KLL EY VL<br>GLSAAKLLTEYGVSVLVL 42 |                              |            |           |          |

  

| Score         | Expect                                                                      | Method                       | Identities | Positives  | Gaps     |
|---------------|-----------------------------------------------------------------------------|------------------------------|------------|------------|----------|
| 15.4 bits(28) | 7.9                                                                         | Compositional matrix adjust. | 5/38(13%)  | 20/38(52%) | 0/38(0%) |
| Query 382     | VLGYMAEMRNEDVSEVAKDAGPSLLFITYAEAIANMPA 419                                  |                              |            |            |          |
| Sbjct 349     | ++G++ + + ++++ K+ + YA+ + + A<br>IMGFILARKADRLAKLHKEIRKKKICELYAKVLGSQEA 386 |                              |            |            |          |

**B**

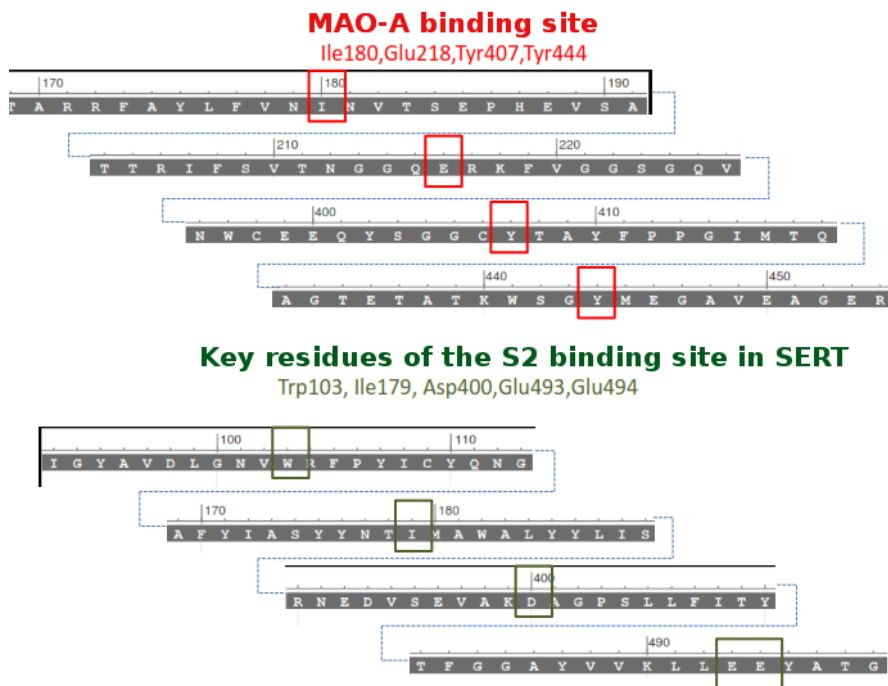

A) Blastp alignment between human SERT and MAO-A. B) Some key residues of the binding sites of MAO-A and SERT are remarked in boxes.
